# Supplementary material
Source: PubMed Central journal article supplement (PMC5086265)
Supplement: NIHMS817460-supplement-01.pdf [file NIHMS817460-supplement-01.pdf]

## Appendix A. Supplementary data

The following is Supplementary data to this article:

**Supplementary Table 1.** Bivariate and Multiple Regression Analyses of Factors Associated with Self-reported Inability to Access Selected Types of Health and Social Services in the Previous 6 Months of Assessment, by Service Type (<sup>a</sup> N=2494).

|                                     | Health Services         |         | Social Services         |         |
|-------------------------------------|-------------------------|---------|-------------------------|---------|
|                                     | Adjusted OR<br>(95% CI) | P-value | Adjusted OR<br>(95% CI) | P-value |
| Mental health conditions, L6M       | 1.54 (1.37 - 1.73)      | <0.001  | 1.44 (1.29 - 1.61)      | <0.001  |
| HIV positive                        | 0.91 (0.79 - 1.06)      | 0.24    | 1.00 (0.88 - 1.15)      | 0.95    |
| HCV positive                        | 0.81 (0.68 - 0.96)      | 0.017   | 0.83 (0.70 - 0.98)      | 0.032   |
| Age in years                        | 0.99 (0.98 - 0.99)      | <0.001  | 1.00 (0.99 - 1.01)      | 0.32    |
| Male                                | 0.90 (0.78 - 1.05)      | 0.18    | 0.74 (0.65 - 0.85)      | <0.001  |
| Caucasian                           | 1.19 (1.04 - 1.37)      | 0.012   | 1.27 (1.12 - 1.44)      | <0.001  |
| Residing in DTES, L6M               | 0.89 (0.78 - 1.01)      | 0.070   | 0.97 (0.86 - 1.09)      | 0.59    |
| Employment, L6M                     | 1.21 (1.06 - 1.38)      | 0.006   | 1.07 (0.94 - 1.21)      | 0.33    |
| Daily heroin use, L6M               | 1.23 (1.06 - 1.44)      | 0.008   | 0.85 (0.73 - 0.99)      | 0.034   |
| Daily prescription opioids use, L6M | 1.21 (0.95 - 1.53)      | 0.12    | 0.92 (0.73 - 1.17)      | 0.502   |
| Daily stimulants use, L6M           | 0.91 (0.79 - 1.04)      | 0.17    | 0.99 (0.88 - 1.12)      | 0.91    |
| Overdose, L6M                       | 1.37 (1.13 - 1.67)      | 0.002   | 1.18 (0.97 - 1.43)      | 0.10    |
| Binge alcohol use, L6M              | 1.38 (1.22 - 1.57)      | <0.001  | 1.15 (1.02 - 1.30)      | 0.024   |
| Incarceration, L6M                  | 1.11 (0.94 - 1.31)      | 0.22    | 1.15 (0.99 - 1.33)      | 0.077   |
| Homelessness, L6M                   | 1.41 (1.24 - 1.62)      | <0.001  | 4.89 (4.33 - 5.51)      | <0.001  |
| Sex work, L6M                       | 1.36 (1.12 - 1.65)      | 0.002   | 0.96 (0.79 - 1.15)      | 0.65    |
| Dealing drugs, L6M                  | 1.22 (1.06 - 1.40)      | 0.005   | 1.27 (1.12 - 1.44)      | <0.001  |
| Victim of violence, L6M             | 1.96 (1.72 - 2.23)      | <0.001  | 1.69 (1.49 - 1.91)      | <0.001  |
| Calendar year                       |                         |         |                         |         |
| 2005-2007                           | Reference               |         | Reference               |         |
| 2008-2010                           | 0.88 (0.76 - 1.00)      | 0.059   | 1.04 (0.92 - 1.19)      | 0.51    |
| 2011-2013                           | 0.68 (0.58 - 0.80)      | <0.001  | 0.75 (0.65 - 0.87)      | <0.001  |
| 2014-2015                           | 0.70 (0.55 - 0.90)      | 0.006   | 0.72 (0.56 - 0.91)      | 0.006   |

<sup>a</sup> A total of 2494 participants with 18,028 observations were analyzed.  
Abbreviations: DTES: downtown eastside; L6M: last six months.

**Supplementary Table 2.** Bivariate and Multiple Regression Analyses of Factors Associated with Self-reported Inability to Access Health and Social Services Excluding Housing in the Previous 6 Months of Assessment (<sup>a</sup> N=2494).

|                                     | Bivariate                 |         | Multivariable           |         |
|-------------------------------------|---------------------------|---------|-------------------------|---------|
|                                     | Unadjusted OR<br>(95% CI) | P-value | Adjusted OR<br>(95% CI) | P-value |
| Mental health conditions, L6M       | 1.70 (1.54 - 1.86)        | <0.001  | 1.48 (1.34 - 1.63)      | <0.001  |
| HIV positive                        | 0.67 (0.59 - 0.77)        | <0.001  | 0.94 (0.82 - 1.06)      | 0.31    |
| HCV positive                        | 0.48 (0.42 - 0.55)        | <0.001  | 0.76 (0.65 - 0.89)      | <0.001  |
| Age in years                        | 0.96 (0.96, 0.97)         | <0.001  | 0.99 (0.99, 1.00)       | 0.003   |
| Male                                | 0.89 (0.78 - 1.01)        | 0.064   | 0.86 (0.75 - 0.97)      | 0.018   |
| Caucasian                           | 1.35 (1.19 - 1.53)        | <0.001  | 1.24 (1.10 - 1.39)      | <0.001  |
| Residing in DTES, L6M               | 0.86 (0.78 - 0.96)        | 0.005   | 0.84 (0.76 - 0.94)      | 0.002   |
| Employment, L6M                     | 1.18 (1.06 - 1.32)        | 0.002   | 1.12 (1.00 - 1.25)      | 0.048   |
| Daily heroin use, L6M               | 1.34 (1.19 - 1.52)        | <0.001  | 1.08 (0.94 - 1.23)      | 0.28    |
| Daily prescription opioids use, L6M | 1.22 (0.99 - 1.49)        | 0.060   | 1.10 (0.90 - 1.35)      | 0.36    |
| Daily stimulants use, L6M           | 1.20 (1.09 - 1.33)        | <0.001  | 0.96 (0.85 - 1.07)      | 0.42    |
| Overdose, L6M                       | 2.03 (1.73 - 2.39)        | <0.001  | 1.46 (1.23 - 1.73)      | <0.001  |
| Binge alcohol use, L6M              | 1.56 (1.40 - 1.73)        | <0.001  | 1.26 (1.14 - 1.41)      | <0.001  |
| Incarceration, L6M                  | 1.75 (1.53 - 2.00)        | <0.001  | 1.20 (1.04 - 1.39)      | 0.011   |
| Homelessness, L6M                   | 1.93 (1.75 - 2.14)        | <0.001  | 1.38 (1.23 - 1.54)      | <0.001  |
| Sex work, L6M                       | 1.55 (1.32 - 1.81)        | <0.001  | 1.19 (1.01 - 1.41)      | 0.039   |
| Dealing drugs, L6M                  | 1.66 (1.49 - 1.84)        | <0.001  | 1.19 (1.06 - 1.34)      | 0.003   |
| Victim of violence, L6M             | 2.58 (2.33 - 2.87)        | <0.001  | 1.95 (1.75 - 2.18)      | <0.001  |
| Calendar year                       |                           |         |                         |         |
| 2005-2007                           | Reference                 |         | Reference               |         |
| 2008-2010                           | 0.75 (0.67 - 0.84)        | <0.001  | 0.88 (0.79 - 0.99)      | 0.034   |
| 2011-2013                           | 0.53 (0.47 - 0.60)        | <0.001  | 0.71 (0.62 - 0.80)      | <0.001  |
| 2014-2015                           | 0.64 (0.53 - 0.78)        | <0.001  | 0.79 (0.65 - 0.96)      | 0.018   |

<sup>a</sup> A total of 2403 participants with 18,200 observations were analyzed.

Abbreviations: DTES: downtown eastside; L6M: last six months.
